# Supplementary material
Source: Elsevier journal article supplement (https://www.sciencedirect.com/science/article/pii/S2341287920301368)
Supplement: mmc1 [file S2341287920301368:mmc1.docx]

**Anexo 1. Hospitales SEN1500 con cirugía pediátrica**

**Andalucía**

1. Hospital Universitario Virgen del Rocío (Sevilla)
2. Hospital Universitario Virgen Macarena (Sevilla)
3. Hospital Universitario Puerta del Mar (Cádiz)
4. Hospital Universitario Materno-Infantil (Málaga)
5. Hospital Universitario Reina Sofía (Córdoba)
6. Hospital Universitario Virgen de las Nieves (Granada)

**Aragón**

1. Hospital Universitario Miguel Servet (Zaragoza)

**Asturias**

1. Hospital Universitario Central de Asturias (Oviedo)

**Canarias**

1. Hospital Universitario Materno-Infantil de Las Palmas (Las Palmas de Gran Canaria)

**Cantabria**

1. Hospital Universitario Marqués de Valdecilla (Santander)

**Castilla la Mancha**

1. Complejo Hospitalario de Toledo (Toledo)
2. Complejo Hospitalario Universitario de Albacete (Albacete)

**Castilla León**

1. Hospital Universitario de León (León)
2. Hospital Universitario de Salamanca (Salamanca)
3. Hospital Universitario de Burgos (Burgos)

**Cataluña**

1. Hospital Universitario Joan XXIII (Tarragona)
2. Hospital Universitari Dr. Josep Trueta (Girona)
3. Hospital Sant Joan de Déu (Barcelona)
4. Consorci Hospitalari del Parc Taulí (Barcelona)
5. Hospital Universitari Germans Trias i Pujol (Barcelona)
6. Hospital de la Santa Creu i Sant Pau (Barcelona)

**Extremadura**

1. Hospital San Pedro de Alcántara (Cáceres)

**Galicia**

1. Complexo Hospitalario Universitario A Coruña (A Coruña)
2. Complexo Hospitalario Universitario de Santiago (A Coruña)
3. Hospital Álvaro Cunqueiro. (Pontevedra)

**Madrid**

1. Hospital General Universitario Gregorio Marañón (Madrid)
2. Hospital Universitario La Paz (Madrid)
3. Hospital Universitario 12 de Octubre (Madrid)
4. Hospital Universitario Clínico San Carlos (Madrid)

**Murcia**

1. Hospital General Universitario Santa Lucía (Cartagena)

**Navarra**

1. Complejo Hospitalario de Navarra - Hospital Virgen del Camino (Pamplona)

**País Vasco**

1. Hospital Universitario Donostia (Guipúzcoa)
2. Hospital Universitario Cruces (Vizcaya)

**Valencia**

1. Hospital Universitario y Politécnico La Fe (Valencia)
2. Hospital Clínico Universitario de Valencia (Valencia)
